# Supplementary material for: Palladium-catalyzed oxidative carbonylation of hydrazides: synthesis of 1,3,4-oxadiazol-2(3H)-ones
Source: Royal Society of Chemistry journal article supplement (doi:10.1039/c4cc08731c), 2014-12-08

## **Palladium-catalyzed Oxidative Carbonylation of the of the hydrazides : Synthesis of 1,3,4-oxadiazol-2(3H)-ones**

Yu Wang,<sup>a</sup> Xu Meng,<sup>b</sup> Yuting Yang,<sup>a</sup> Lutao Zhang,<sup>a</sup> Shuaibo Guo,<sup>a</sup> Dong Tang,<sup>a</sup> Yaxuan Li<sup>a</sup> and Baohua Chen<sup>\*,a</sup>

<sup>a</sup> State Key Laboratory of Applied Organic Chemistry, Lanzhou University, Gansu Lanzhou, 730000, P. R. China and Key Laboratory of Nonferrous Metal Chemistry and Resources Utilization of Gansu Province, Lanzhou 730000, P.R. China

Fax: +(86)-931-891-2582; E-mail: chbh@lzu.edu.cn

<sup>b</sup> State Key Laboratory for Oxo Synthesis and Selective Oxidation, Lanzhou Institute of Chemical Physics, Chinese Academy of Sciences, Lanzhou 730000, P.R. China

### **Supporting Information**

Contents:

1. General Information
2. Synthesis and Characterization for 1,3,4-oxadiazol-2(3H)-ones

## 1. General Information

Column chromatography was carried out on silica gel.  $^1\text{H}$  NMR spectra were recorded on 400 MHz in  $\text{CDCl}_3$  or Dimethyl Sulfoxide- $\text{D}_6$  and  $^{13}\text{C}$  NMR spectra were recorded on 100 MHz in  $\text{CDCl}_3$  using TMS as internal standard. Melting points were determined on a microscopic apparatus and were uncorrected. Copies of all desired products  $^1\text{H}$  NMR and  $^{13}\text{C}$  NMR spectra are provided. Commercially available reagents and solvents were used without further purification. Hydrazides were prepared according to following literatures:

- (1) T. Fang, Q. Tan, Z. Ding, B. Liu and B. Xu, *Org. Lett.*, 2014, 16, 2342-2345.
- (2) K. Hisler, A. G. J. Commeureuc, S.-z. Zhou and J. A. Murphy, *Tetrahedron Letters*, 2009, 50, 3290-3293.
- (3) A. A. Berezin, G. Zissimou, C. P. Constantinides, Y. Beldjoudi, J. M. Rawson and P. A. Koutentis, *J. Org. Chem.*, 2014, 79, 314-327.
- (4) X. Zhang, M. Breslav, J. Grimm, K. Guan, A. Huang, F. Liu, C. A. Maryanoff, D. Palmer, M. Patel, Y. Qian, C. Shaw, K. Sorigi, S. Stefanick and D. Xu, *J. Org. Chem.*, 2002, 67, 9471-9474.
- (5) P.-L. Wu, S.-Y. Peng, J. Magrath, *Synthesis*, 1995, (4), 435-438

## 2. Synthesis and Characterization for 1,3,4-oxadiazol-2(3H)-ones

- 1) Typical procedure for carbonylation of hydrazides for the synthesis of 1,3,4-oxadiazol-2(3H)-ones.

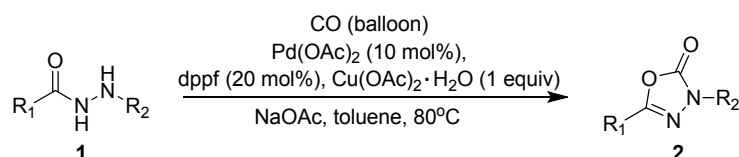

Hydrazide **1** (0.2 mmol), Pd(OAc)<sub>2</sub> (10 mol%, 4.4 mg), Cu(OAc)<sub>2</sub>·H<sub>2</sub>O (0.2 mmol, 40 mg), dppf (20 mol%, 22.2 mg), NaOAc (0.2 mmol, 16.4 mg), and toluene (2 mL) was charged in a round bottom flask equipped with stirrer. Then, the flask was evacuated and back-filled with CO (3 times, balloon). The resulting mixture was stirred for 36h at 80°C. When the reaction was completed, the mixture was cooled to room temperature and vented to discharge the excess CO. The mixture was purified by column chromatography with petroleum ether/ethyl acetate as the eluent to give **2**.

- 2) Characterization Data of 1,3,4-oxadiazol-2(3H)-ones

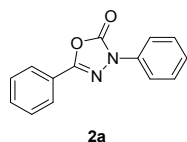

**2a**<sup>1</sup>: White solid;  $^1\text{H}$ -NMR( $\text{CDCl}_3$ , 400 MHz):  $\delta$  = 7.94 (dd,  $J$  = 4.5, 3.7 Hz, 4H), 7.55 – 7.43 (m, 5H), 7.31 – 7.23 (m, 1H).  $^{13}\text{C}$  NMR ( $\text{CDCl}_3$ , 100 MHz)  $\delta$  = 153.4, 150.6, 135.9, 131.9, 129.1, 129.0, 126.1, 125.9, 123.3, 118.2.

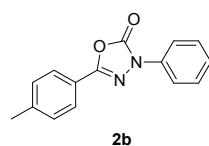

2b<sup>2</sup>: White solid; <sup>1</sup>H-NMR(CDCl<sub>3</sub>, 400 MHz): δ = 7.98 – 7.90 (m, 2H), 7.81 (d, *J* = 8.2 Hz, 2H), 7.49 – 7.42 (m, 2H), 7.34 – 7.21 (m, 3H), 2.41 (s, 3H). <sup>13</sup>C NMR (CDCl<sub>3</sub>, 100 MHz) δ = 153.6, 150.6, 142.5, 136.0, 129.6, 129.1, 125.9, 125.8, 120.5, 118.1, 21.6.

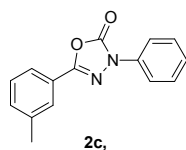

2c: White solid, m.p. 122-124°C, HRMS (ESI) calcd for C<sub>15</sub>H<sub>12</sub>N<sub>2</sub>O<sub>2</sub> (M + H)<sup>+</sup> 252.0972, found 252.0970; <sup>1</sup>H NMR (CDCl<sub>3</sub>, 400 MHz): δ = 7.98 – 7.90 (m, 2H), 7.74 (dd, *J* = 10.7, 4.1 Hz, 2H), 7.49 – 7.43 (m, 2H), 7.37 (dd, *J* = 14.2, 6.6 Hz, 2H), 7.30 – 7.24 (m, 2H), 2.43 (s, 3H). <sup>13</sup>C NMR (CDCl<sub>3</sub>, 100 MHz) δ = 153.6, 150.6, 138.9, 135.9, 132.7, 129.1, 128.9, 126.3, 126.0, 123.2, 123.1, 118.2, 21.3.

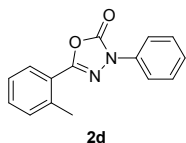

2d: White solid, m.p. 83-85°C, HRMS (ESI) calcd for C<sub>15</sub>H<sub>12</sub>N<sub>2</sub>O<sub>2</sub> (M + H)<sup>+</sup> 252.0972, found 252.0970; <sup>1</sup>H NMR (CDCl<sub>3</sub>, 400 MHz): δ = 7.94 (dd, *J* = 8.7, 0.9 Hz, 2H), 7.88 – 7.83 (m, 1H), 7.49 – 7.38 (m, 3H), 7.36 – 7.24 (m, 3H), 2.69 (s, 3H). <sup>13</sup>C NMR (CDCl<sub>3</sub>, 100 MHz) δ = 153.7, 150.3, 138.0, 136.0, 131.7, 131.3, 129.1, 128.0, 126.1, 125.9, 121.9, 118.0, 22.2.

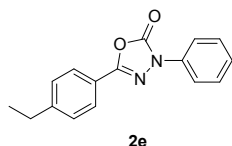

2e: White solid, m.p. 76-77°C, HRMS (ESI) calcd for C<sub>16</sub>H<sub>14</sub>N<sub>2</sub>O<sub>2</sub> (M + H)<sup>+</sup> 267.1128, found 267.1124; <sup>1</sup>H NMR (CDCl<sub>3</sub>, 400 MHz): δ = 7.94 (d, *J* = 7.9 Hz, 2H), 7.84 (d, *J* = 8.2 Hz, 2H), 7.45 (t, *J* = 8.0 Hz, 2H), 7.35 – 7.23 (m, 3H), 2.71 (q, *J* = 7.6 Hz, 2H), 1.27 (t, *J* = 7.6 Hz, 3H). <sup>13</sup>C NMR (CDCl<sub>3</sub>, 100 MHz) δ = 153.6, 150.6, 148.7, 136.0, 129.1, 128.51, 125.9, 120.7, 118.1, 28.9, 15.1.

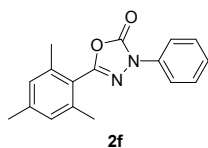

2f: White solid, m.p. 61-62°C, HRMS (ESI) calcd for C<sub>17</sub>H<sub>16</sub>N<sub>2</sub>O<sub>2</sub> (M + H)<sup>+</sup> 281.1285, found 281.1279; <sup>1</sup>H NMR (CDCl<sub>3</sub>, 400 MHz): δ = 7.94 (dd, *J* = 8.8, 1.0 Hz, 1H), 7.49 – 7.42 (m, 1H), 7.29 – 7.21 (m, 0H), 6.96 (s, 1H), 2.39 (s, 6H), 2.33 (s, 3H). <sup>13</sup>C NMR (CDCl<sub>3</sub>, 100 MHz) δ = 153.6, 151.0, 141.3, 138.6, 136.0, 129.1, 129.0, 125.9, 120.3, 118.0, 21.2, 20.4.

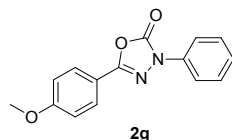

2g: White solid, m.p. 132-134°C, HRMS (ESI) calcd for C<sub>15</sub>H<sub>12</sub>N<sub>2</sub>O<sub>3</sub> (M + H)<sup>+</sup> 269.0921, found 269.0919; <sup>1</sup>H NMR (CDCl<sub>3</sub>, 400 MHz): δ = 7.93 (d, *J* = 8.0 Hz, 2H), 7.87 (d, *J* = 8.8 Hz, 2H), 7.46 (t, *J* = 7.9 Hz, 2H), 7.29 – 7.22 (m, 2H), 6.99 (d, *J* = 8.9 Hz, 2H), 3.87 (s, 3H). <sup>13</sup>C NMR (CDCl<sub>3</sub>, 100 MHz) δ = 162.4, 153.5, 150.7, 136.0, 129.1, 127.7, 125.9, 118.1, 115.7, 114.4, 55.4.

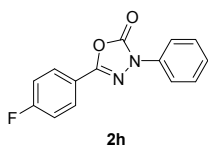

2h: White solid, m.p. 125-126°C, HRMS (ESI) calcd for C<sub>14</sub>H<sub>9</sub>N<sub>2</sub>O<sub>2</sub>F (M + H)<sup>+</sup> 257.0721, found 257.0719; <sup>1</sup>H NMR (CDCl<sub>3</sub>, 400 MHz): δ = 7.98 – 7.88 (m, 4H), 7.49 – 7.43 (m, 2H), 7.28 (dd, *J* = 12.2, 4.5 Hz, 1H), 7.22 – 7.16 (m, 2H). <sup>13</sup>C NMR (CDCl<sub>3</sub>, 100 MHz) δ = 166.0, 163.51, 152.6, 150.4, 135.8, 129.1, 128.2, 128.1, 126.1, 119.6, 119.6, 118.1, 116.5, 116.3.

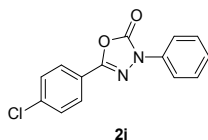

2i: White solid, m.p. 118-119°C, HRMS (ESI) calcd for C<sub>14</sub>H<sub>9</sub>N<sub>2</sub>O<sub>2</sub>Cl (M + H)<sup>+</sup> 273.0425, found 273.0422; <sup>1</sup>H NMR (CDCl<sub>3</sub>, 400 MHz): δ = 7.94 – 7.88 (m, 2H), 7.88 – 7.83 (m, 2H), 7.46 (dq, *J* = 9.1, 1.9 Hz, 4H), 7.27 (dd, *J* = 11.2, 4.8 Hz, 1H). <sup>13</sup>C NMR (CDCl<sub>3</sub>, 100 MHz) δ = 152.6, 150.3, 138.1, 135.8, 129.3, 129.1, 127.1, 126.1, 121.7, 118.1.

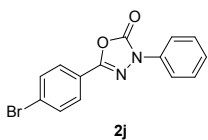

2j: White solid, m.p. 124-125°C, HRMS (ESI) calcd for C<sub>14</sub>H<sub>9</sub>N<sub>2</sub>O<sub>2</sub>Br (M + H)<sup>+</sup> 316.9919, found 316.9915; <sup>1</sup>H NMR (CDCl<sub>3</sub>, 400 MHz): δ = 7.95 – 7.88 (m, 2H), 7.78 (dd, *J* = 8.7, 2.1 Hz, 2H), 7.63 (dd, *J* = 8.8, 2.0 Hz, 2H), 7.49 – 7.42 (m, 2H), 7.31 – 7.23 (m, 1H). <sup>13</sup>C NMR (CDCl<sub>3</sub>, 100 MHz) δ = 152.7, 150.3, 135.7, 132.3, 129.1, 127.2, 126.6, 126.2, 122.2, 118.1.

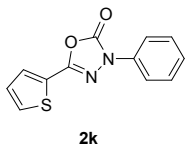

2k: Yellow solid, m.p. 120-122°C, HRMS (ESI) calcd for C<sub>12</sub>H<sub>8</sub>N<sub>2</sub>O<sub>2</sub>S (M + H)<sup>+</sup> 245.0379, found 245.0377; <sup>1</sup>H NMR (CDCl<sub>3</sub>, 400 MHz): δ = 7.91 (d, *J* = 7.9 Hz, 2H), 7.68 (dd, *J* = 3.6, 0.7 Hz, 1H), 7.55 (d, *J* = 4.9 Hz, 1H), 7.46 (dd, *J* = 10.8, 5.1 Hz, 2H), 7.29 – 7.24 (m, 2H), 7.16 (dd, *J* = 4.8, 3.9 Hz, 1H). <sup>13</sup>C NMR (CDCl<sub>3</sub>, 100 MHz) δ = 150.2, 150.0, 135.8, 130.21, 129.8, 129.1, 128.0, 126.1, 124.8, 118.2.

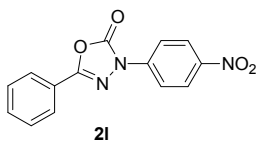

2l: Yellow solid; <sup>1</sup>H NMR (CDCl<sub>3</sub>, 400 MHz): δ = 8.34 (d, *J* = 9.1 Hz, 2H), 8.18 (d, *J* = 9.0 Hz, 2H), 7.95 (d, *J* = 7.3 Hz, 2H), 7.57 (dt, *J* = 25.2, 7.3 Hz, 3H). <sup>13</sup>C NMR (CDCl<sub>3</sub>, 100 MHz) δ = 154.3, 150.0, 144.8, 140.8, 132.6, 129.1, 126.1, 125.0, 122.6, 117.8.

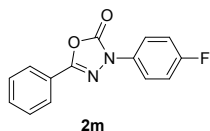

2n: White solid, m.p. 142-144°C, HRMS (ESI) calcd for  $C_{14}H_9N_2O_2F$  ( $M + H$ )<sup>+</sup> 257.0721, found 257.0719; <sup>1</sup>H NMR ( $CDCl_3$ , 400 MHz):  $\delta$  = 8.01 – 7.86 (m, 4H), 7.59 – 7.48 (m, 3H), 7.21 – 7.12 (m, 2H). <sup>13</sup>C NMR ( $CDCl_3$ , 100 MHz)  $\delta$  = 161.7, 159.2, 153.5, 150.6, 132.0, 129.0, 125.9, 123.2, 120.1, 120.0, 116.1, 115.9.

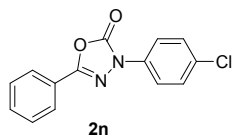

2o<sup>4</sup>: White solid; <sup>1</sup>H NMR ( $CDCl_3$ , 400 MHz):  $\delta$  = 7.96 – 7.84 (m, 4H), 7.57 – 7.46 (m, 3H), 7.44 – 7.37 (m, 2H). <sup>13</sup>C NMR ( $CDCl_3$ , 100 MHz)  $\delta$  = 153.5, 150.3, 134.5, 132.0, 131.4, 129.2, 129.0, 125.9, 123.0, 119.2.

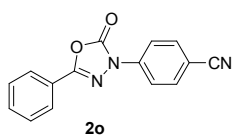

2p: White solid, m.p. 180-182°C, HRMS (ESI) calcd for  $C_{15}H_9N_3O_2$  ( $M + H$ )<sup>+</sup> 263.0768, found 264.0764; <sup>1</sup>H NMR ( $CDCl_3$ , 400 MHz):  $\delta$  = 8.11 (d,  $J$  = 8.7 Hz, 2H), 7.98 – 7.89 (m, 2H), 7.75 (d,  $J$  = 8.6 Hz, 2H), 7.61 – 7.48 (m, 3H). <sup>13</sup>C NMR ( $CDCl_3$ , 100 MHz)  $\delta$  = 174.2, 154.1, 149.9, 139.2, 133.3, 132.4, 129.1, 126.0, 122.6, 118.2, 117.9, 109.2.

Citation for the known compounds:

1. M. Marky, H. Meier, A. Wunderli, H. Heimgartner and H. Schmid, *Helv. Chim. Acta*, 1978, 61, 1477-1510.
2. P. Guenter, S. Erich, S. Norbert, M. Thomas, R. Guenter, *Ger. Offen.*, 1980, DE 2833470 A1 19800207.
3. G. Scherowsky and B. Kundu, *Liebigs Ann. Chem.*, 1977, 1235-1247.
4. C. Grunwald, C. Rundfeldt, H. J. Lankau, T. Arnold, N. Hofgen, R. Dost, U. Egerland, H. J. Hofmann and K. Unverferth, *J. Med. Chem.*, 2006, 49, 1855-1866.

3) Copies of  $^1\text{H}$  and  $^{13}\text{C}$  NMR Spectra

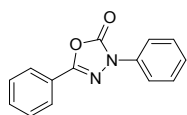

**2a**

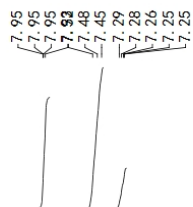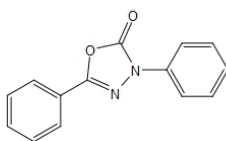

**2a**

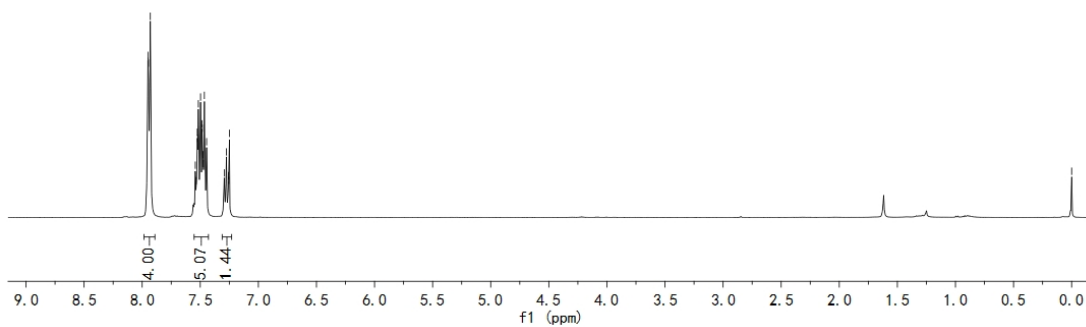

153.47  
150.64

135.97

129.16

126.10

123.36

118.24

77.32  
77.00  
76.68

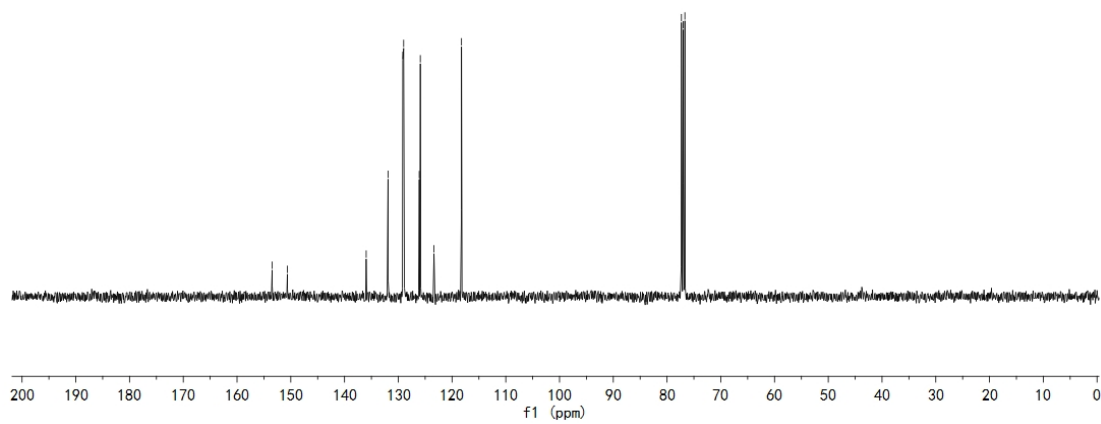

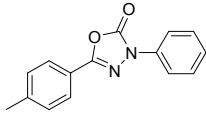

2b

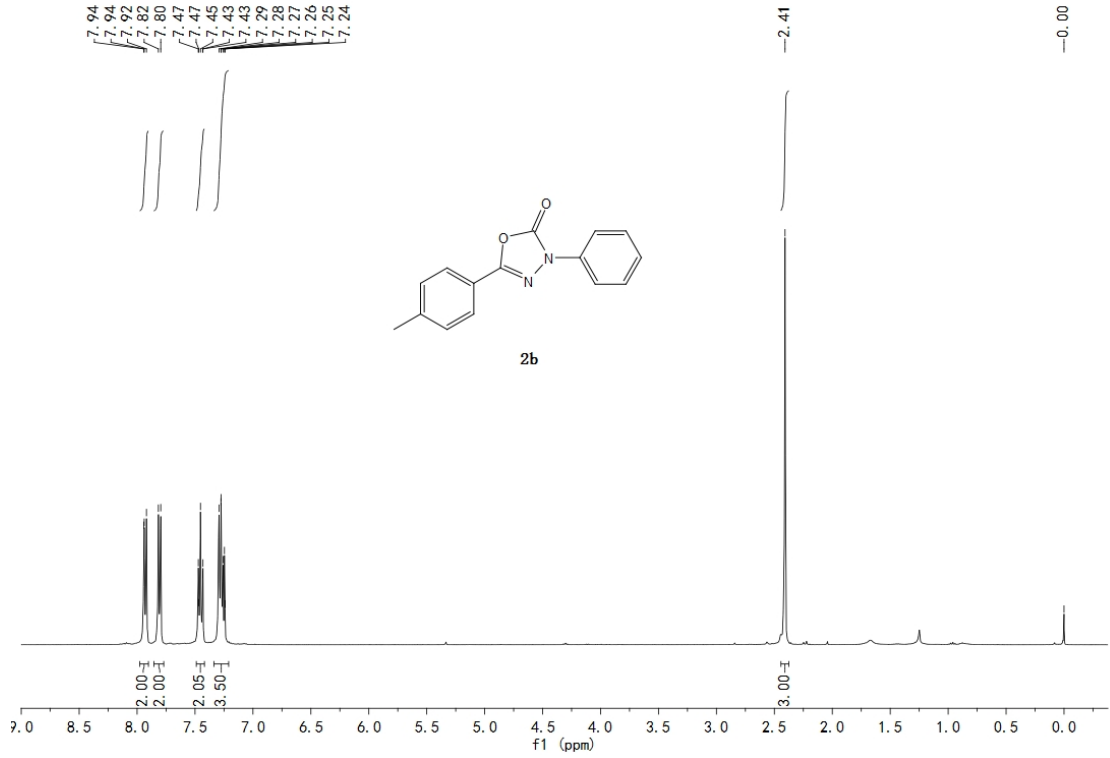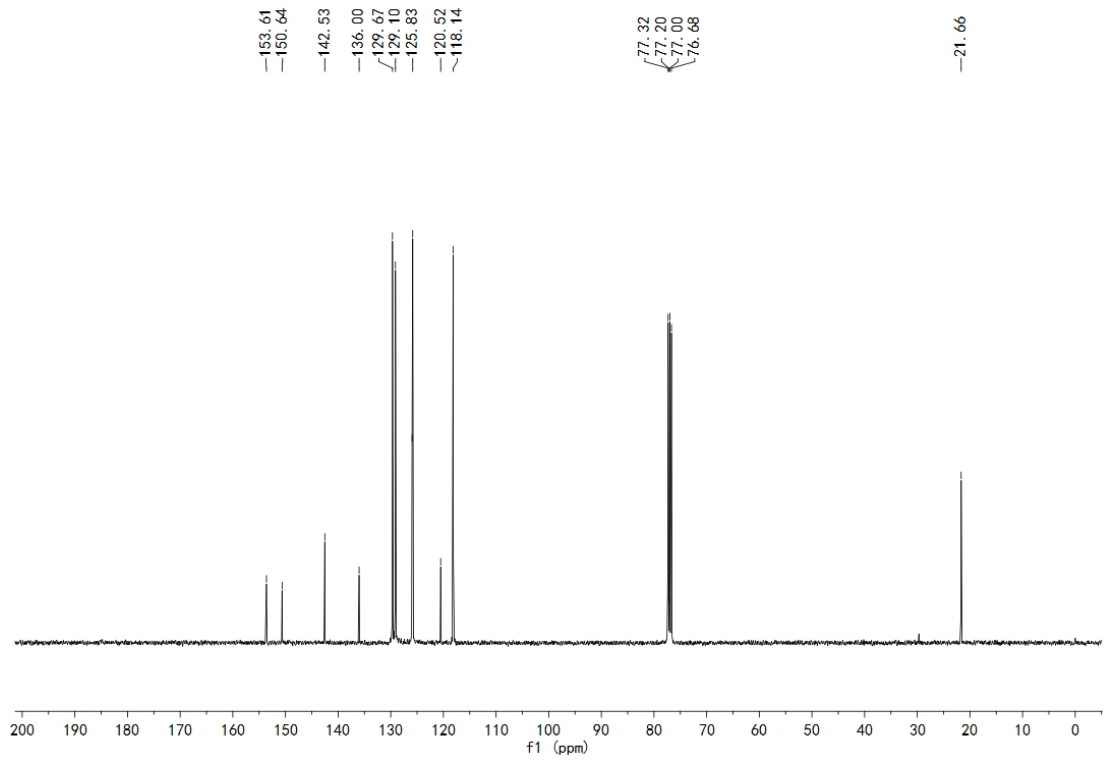

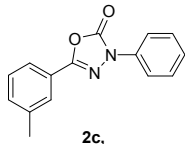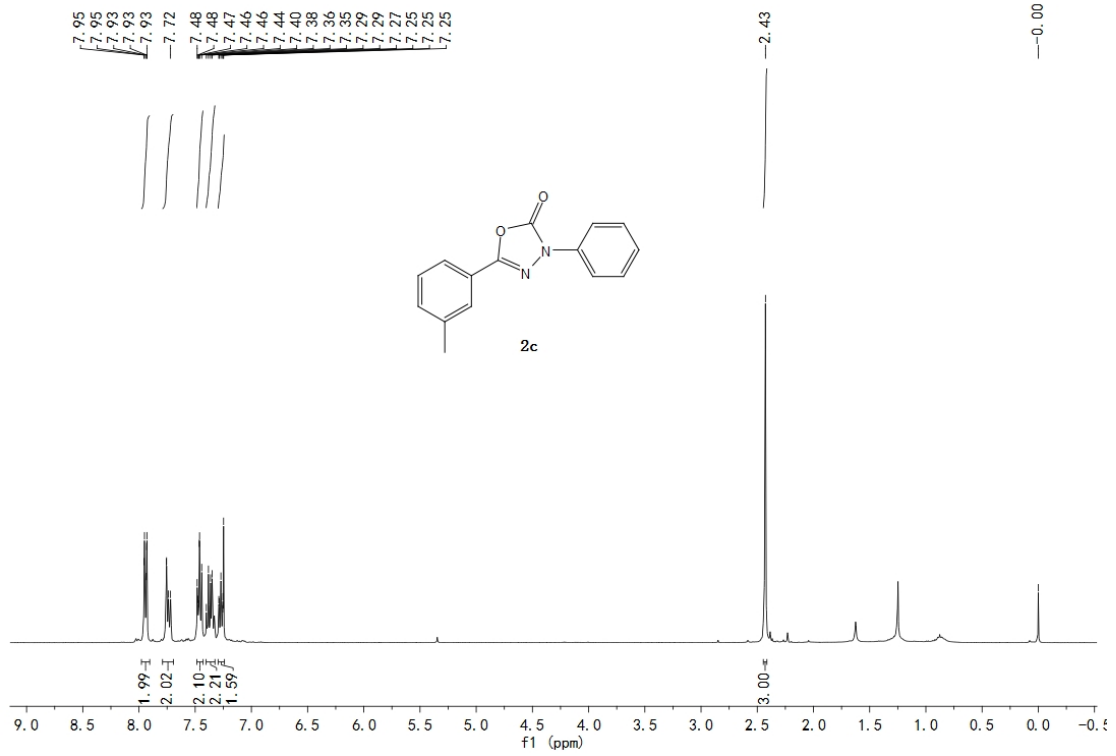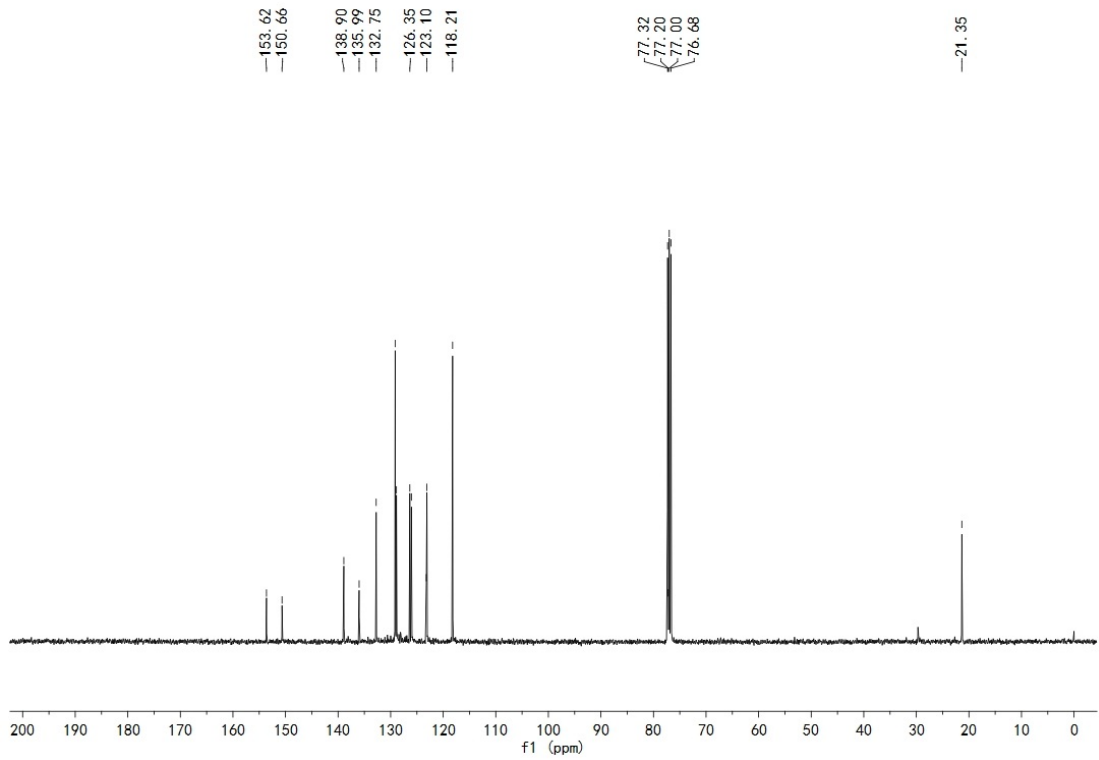



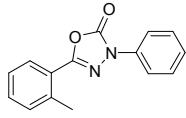

2d

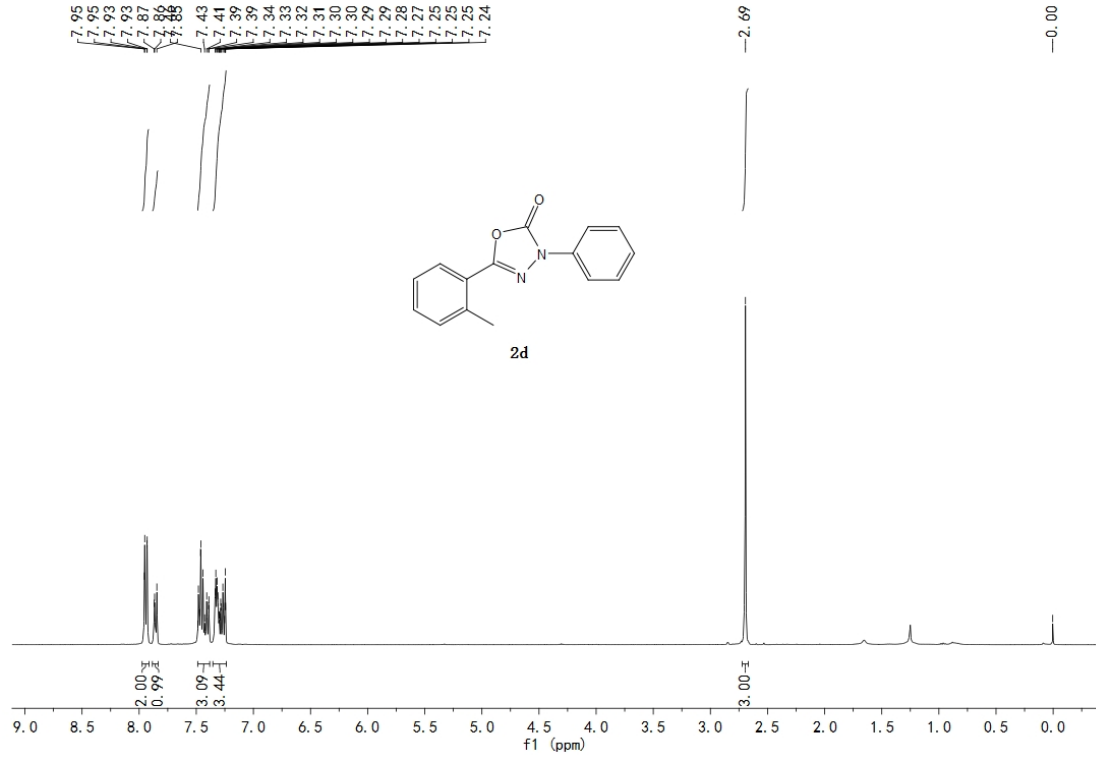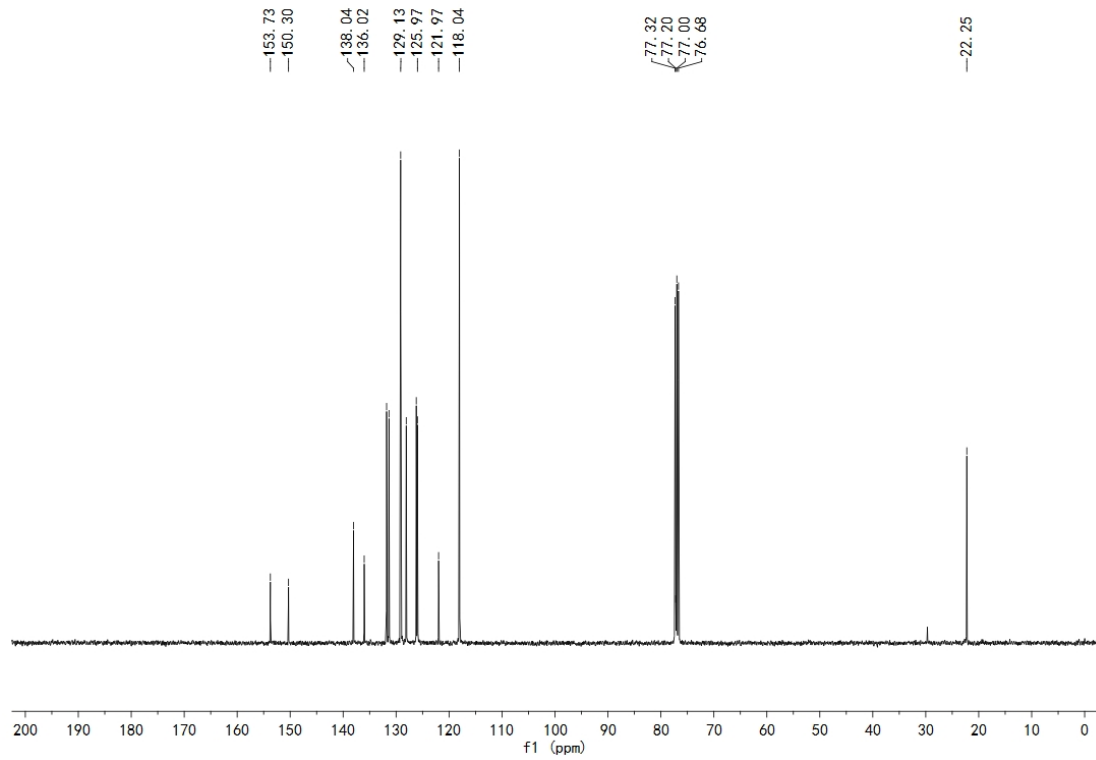

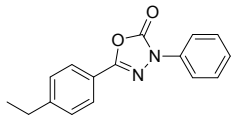

2e

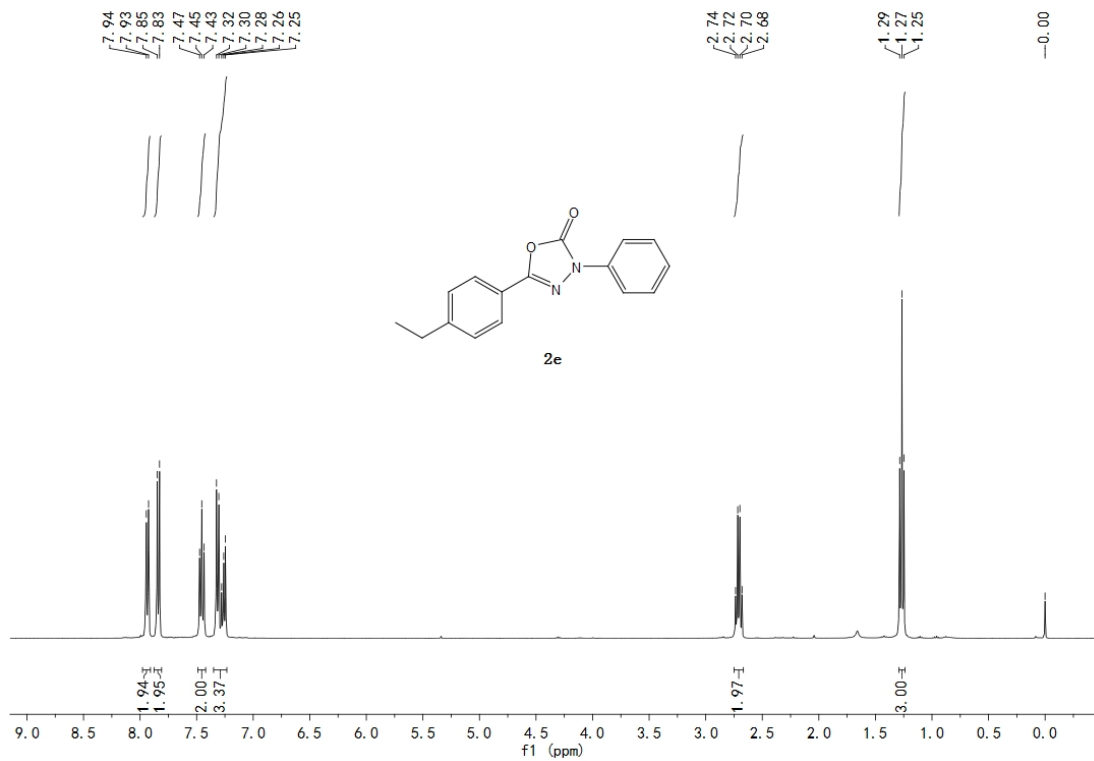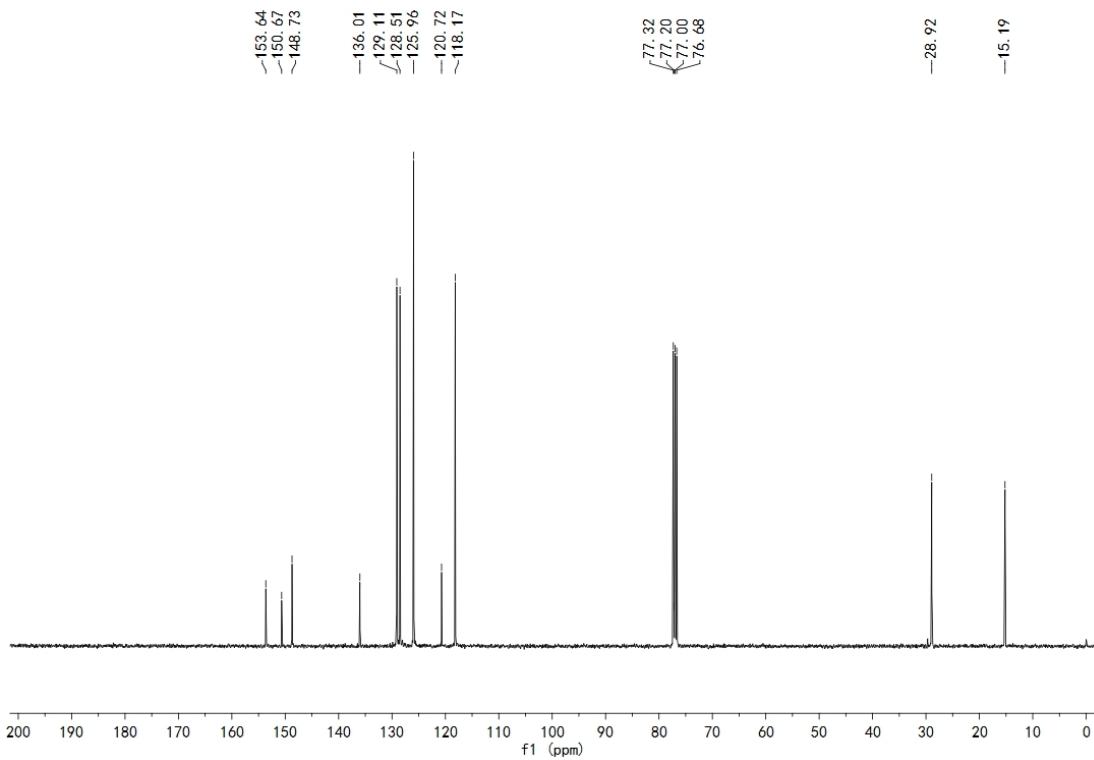

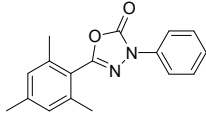

2f

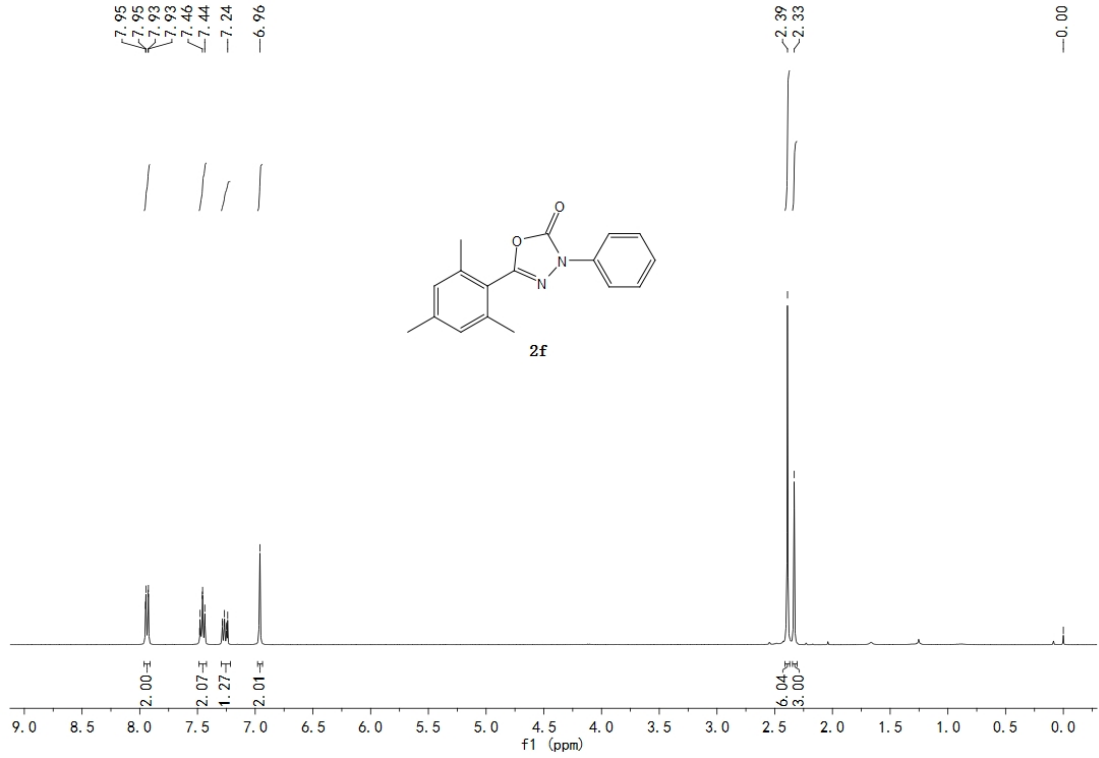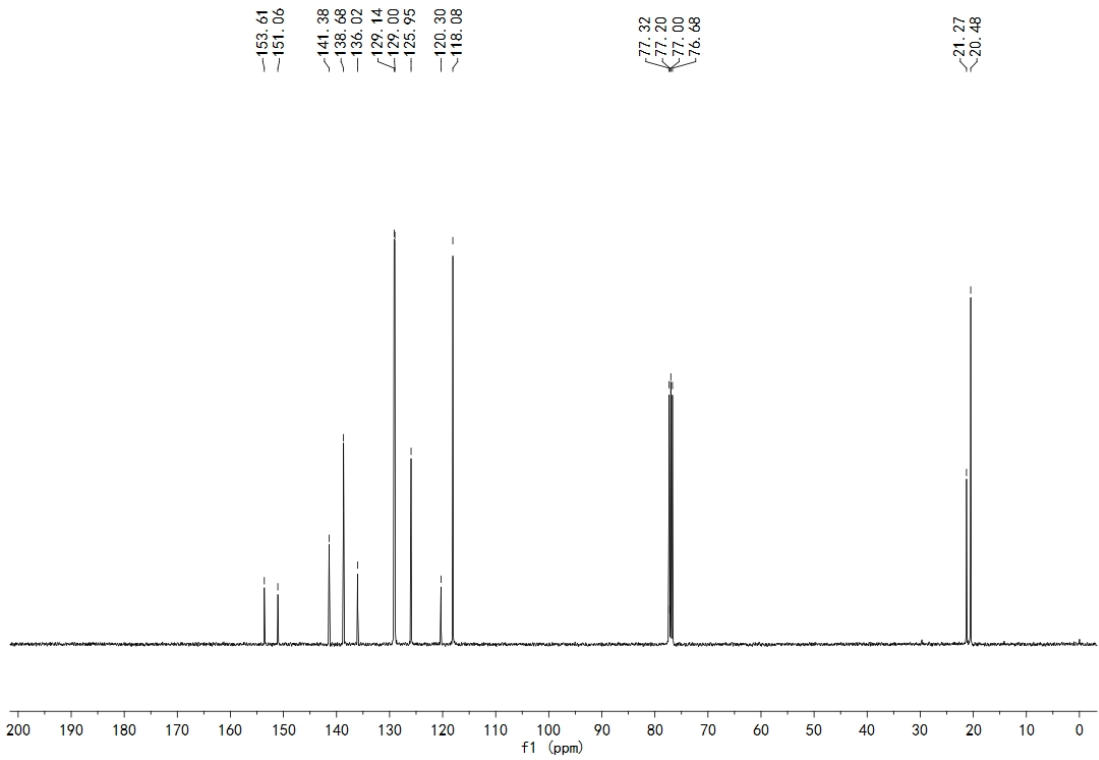

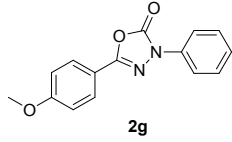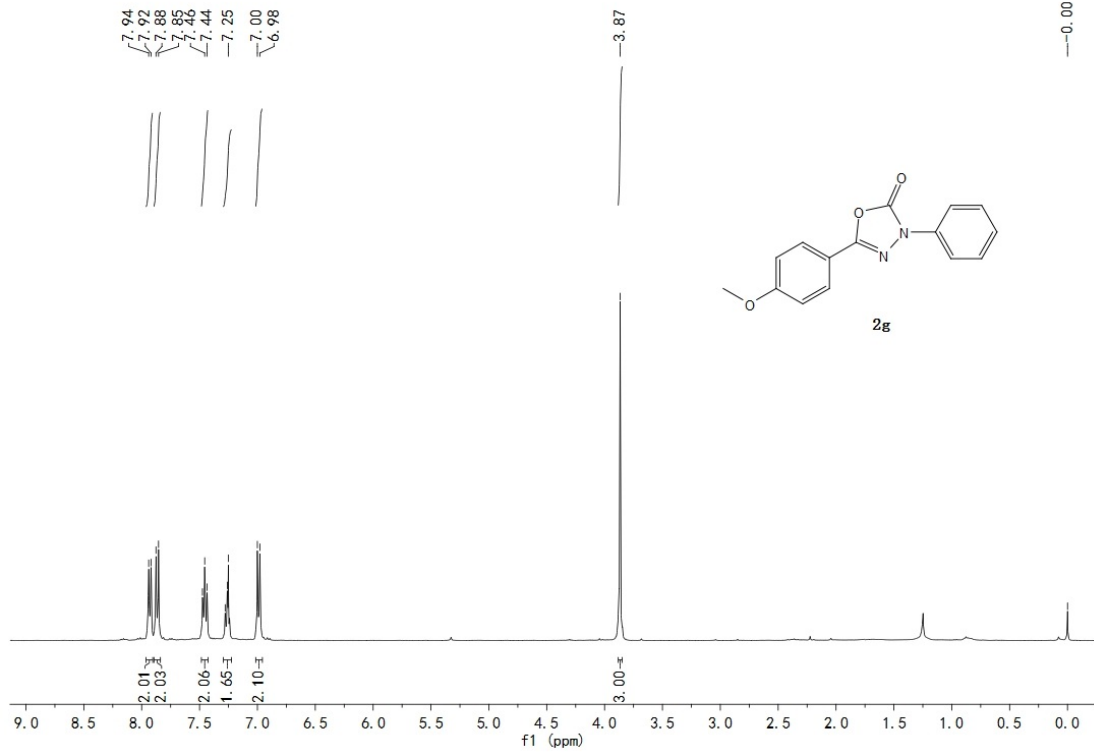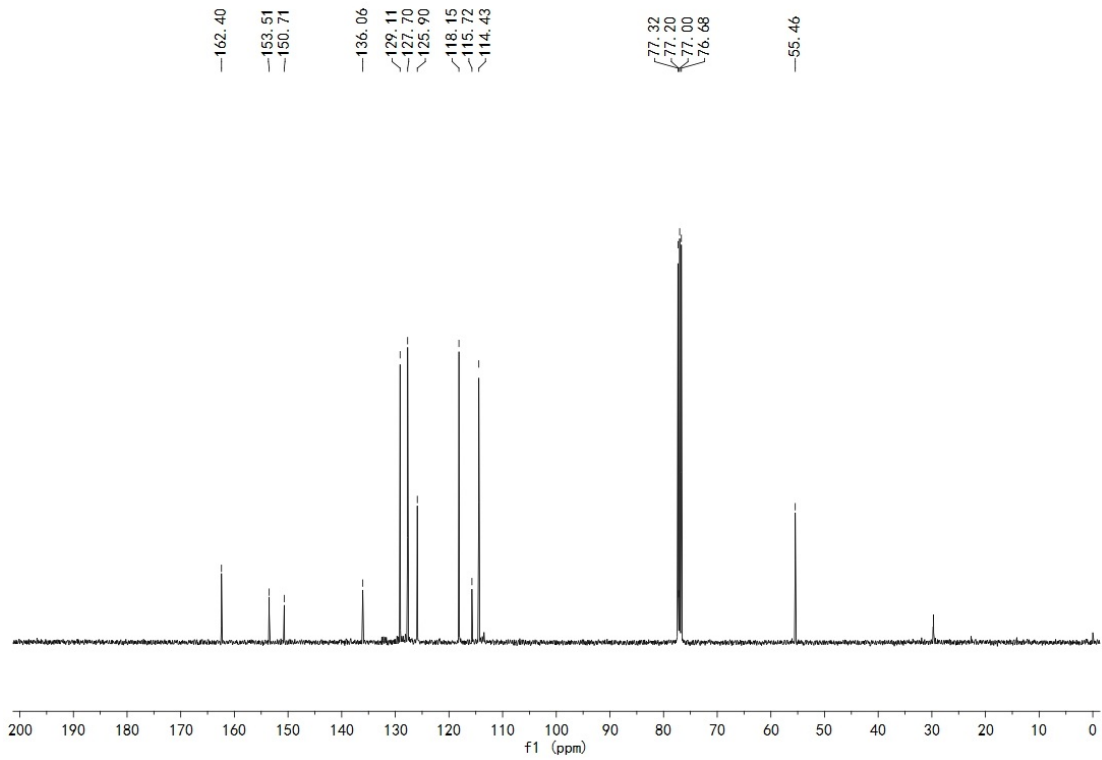

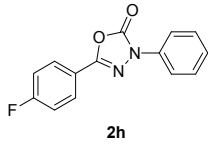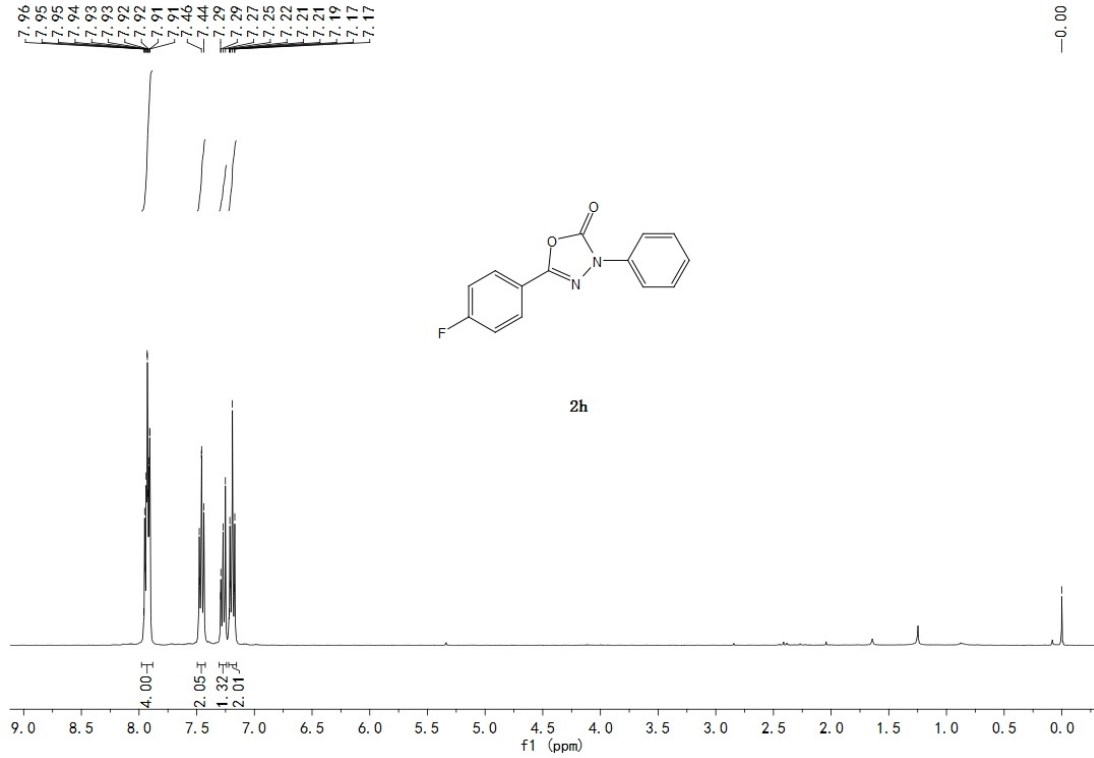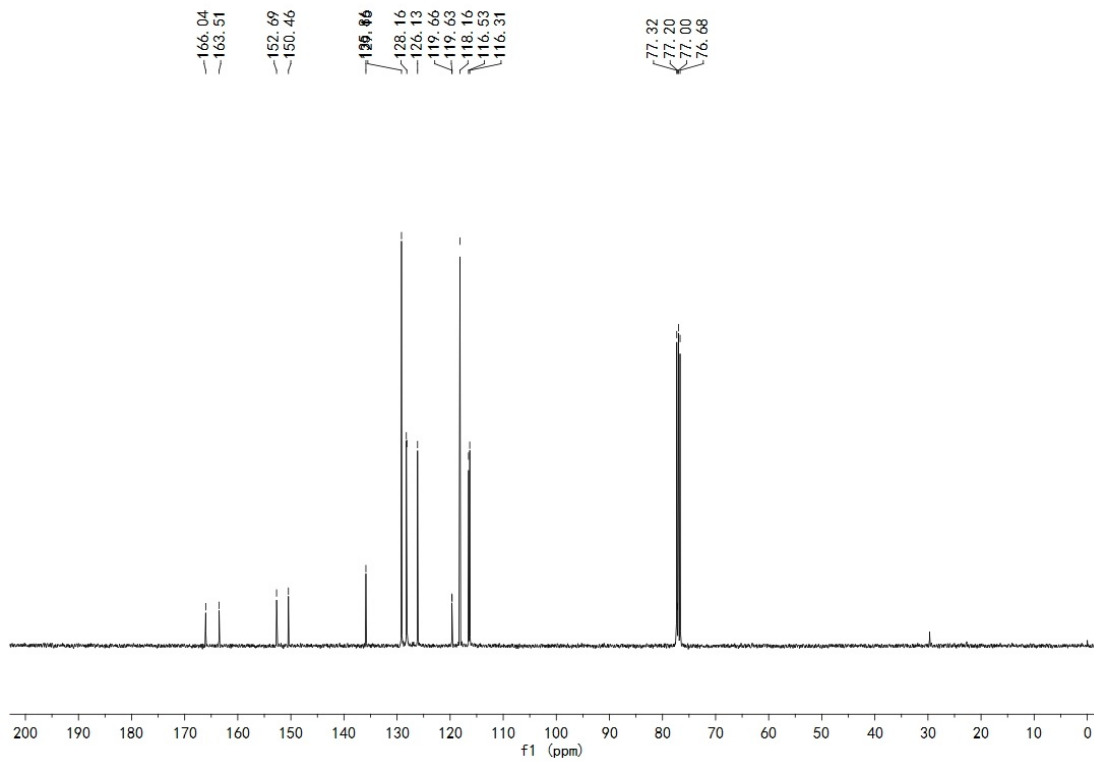

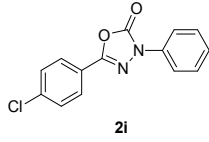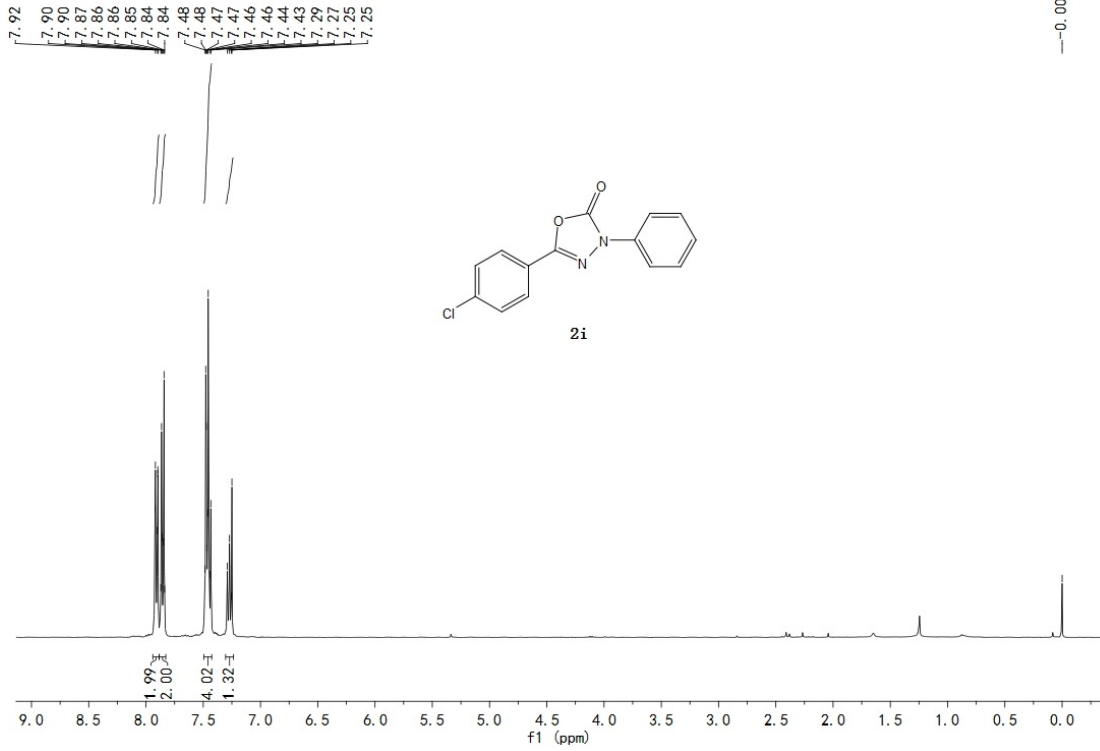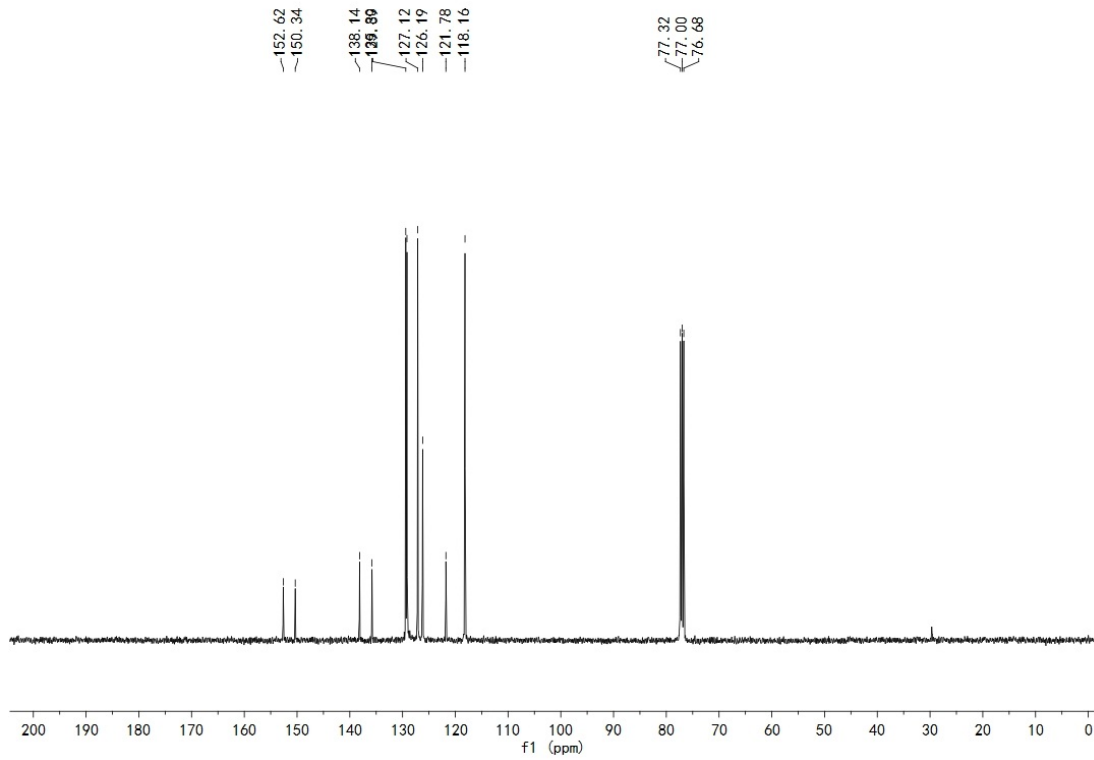

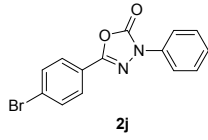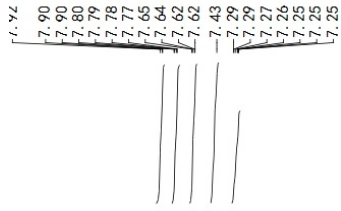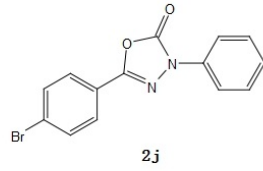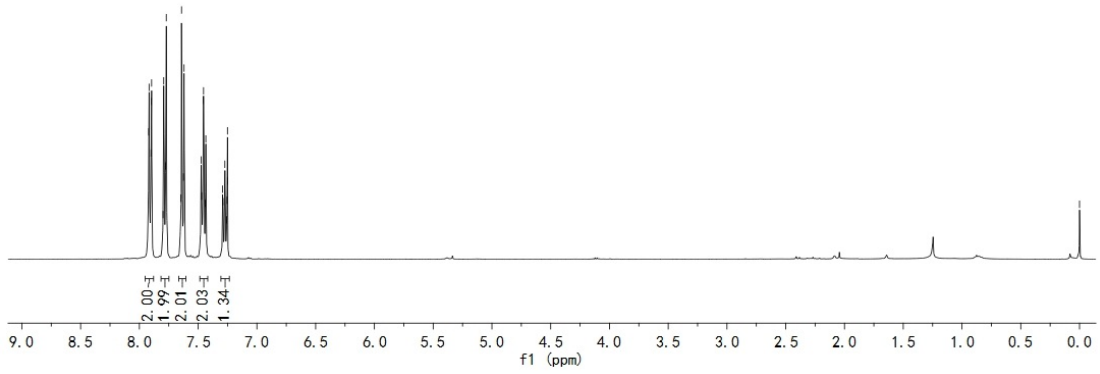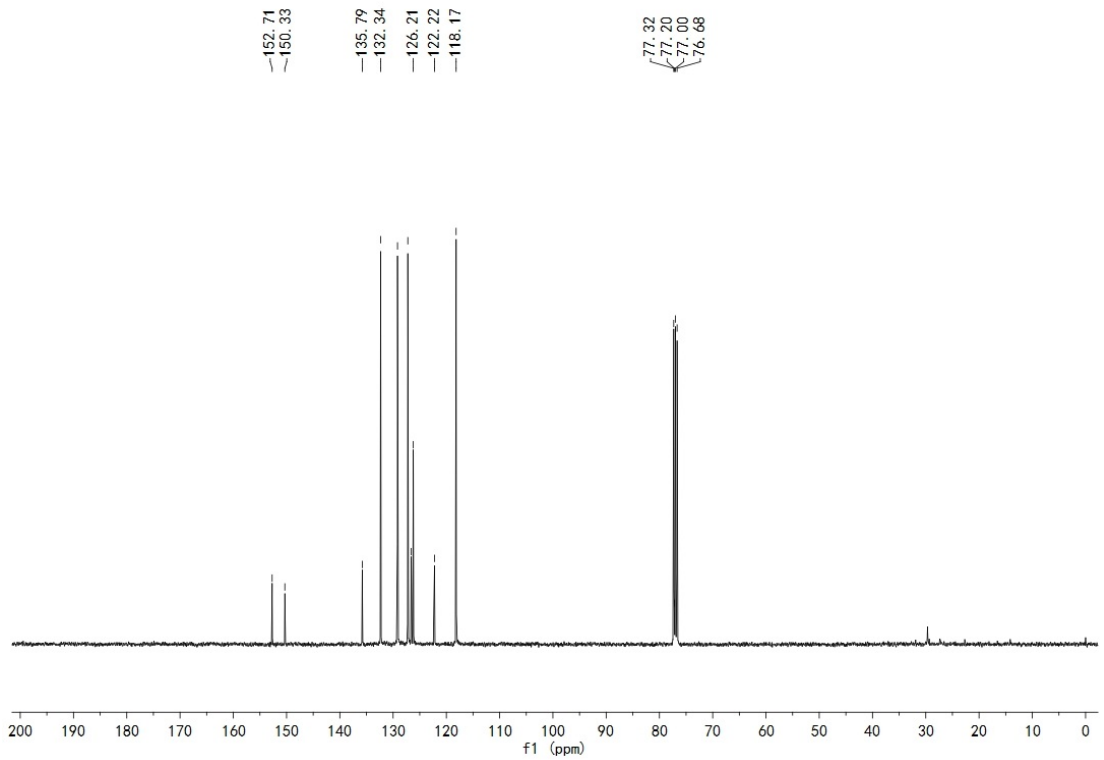

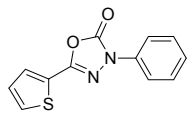

2k

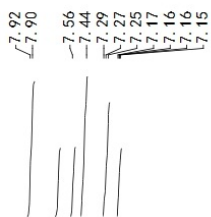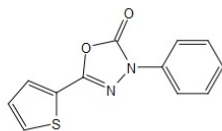

2k

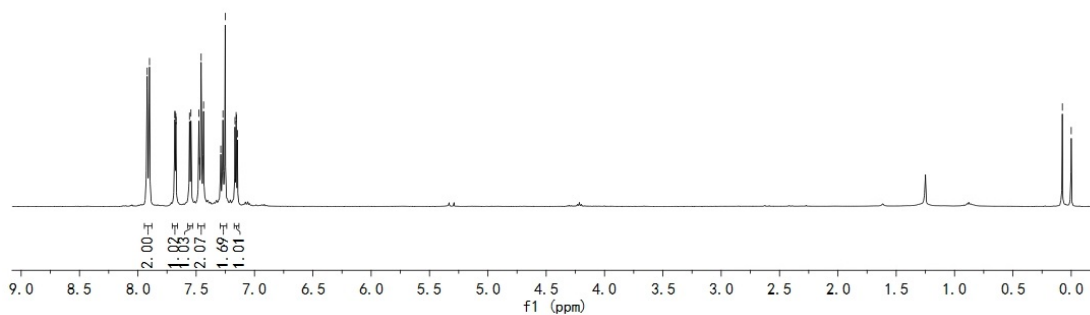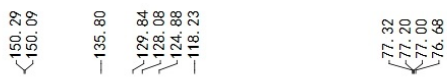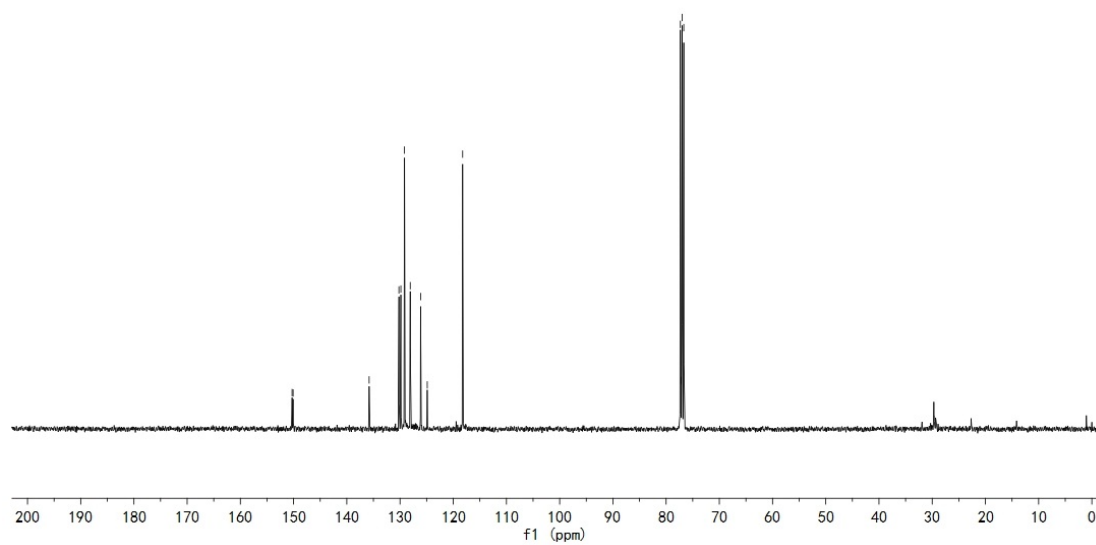





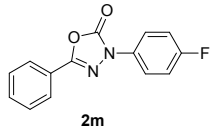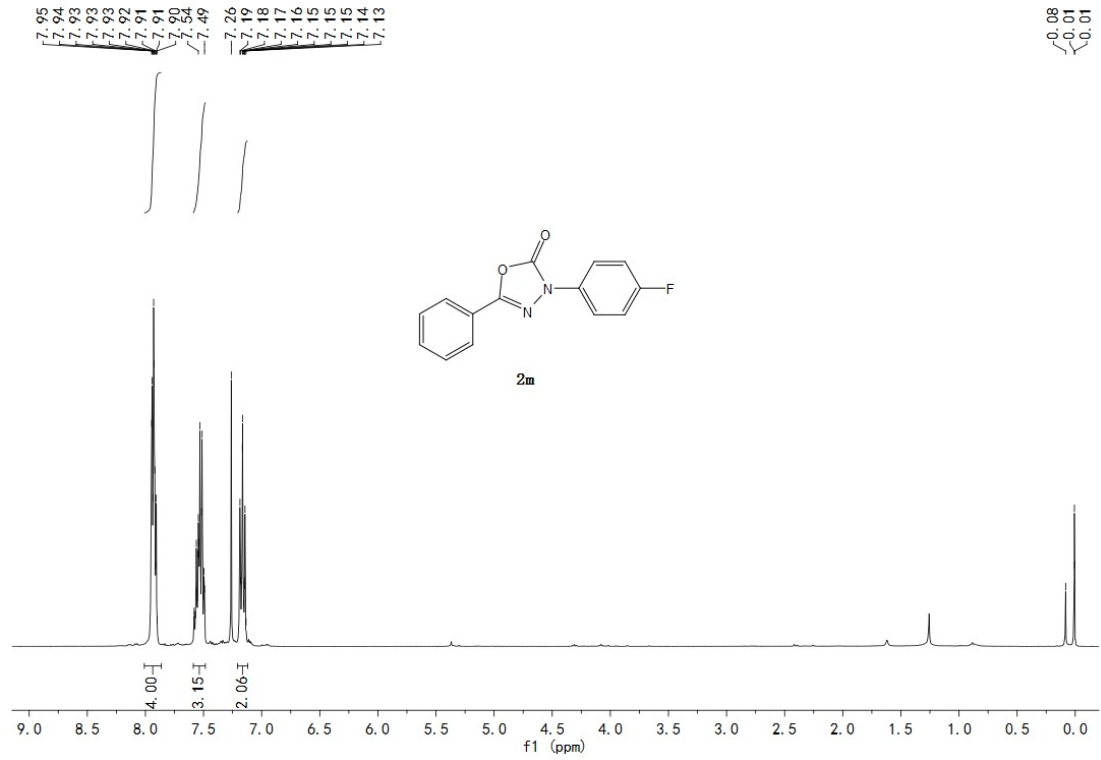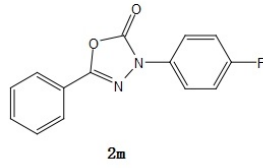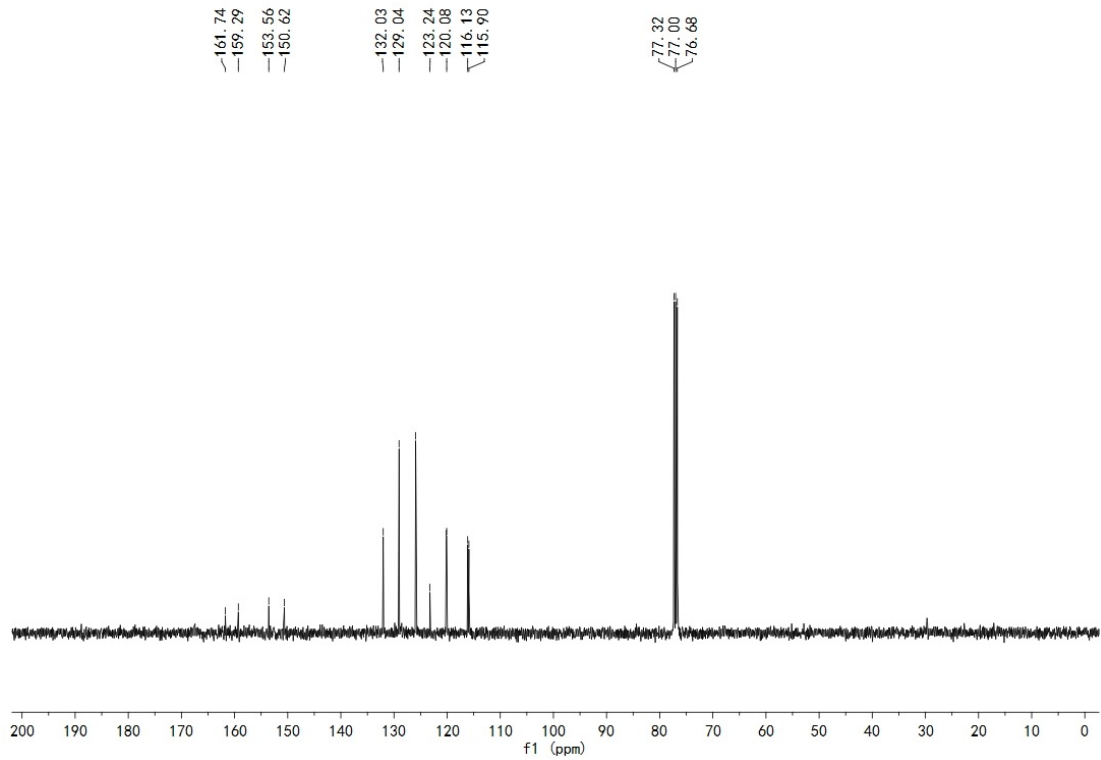

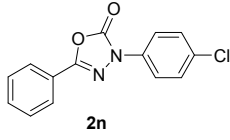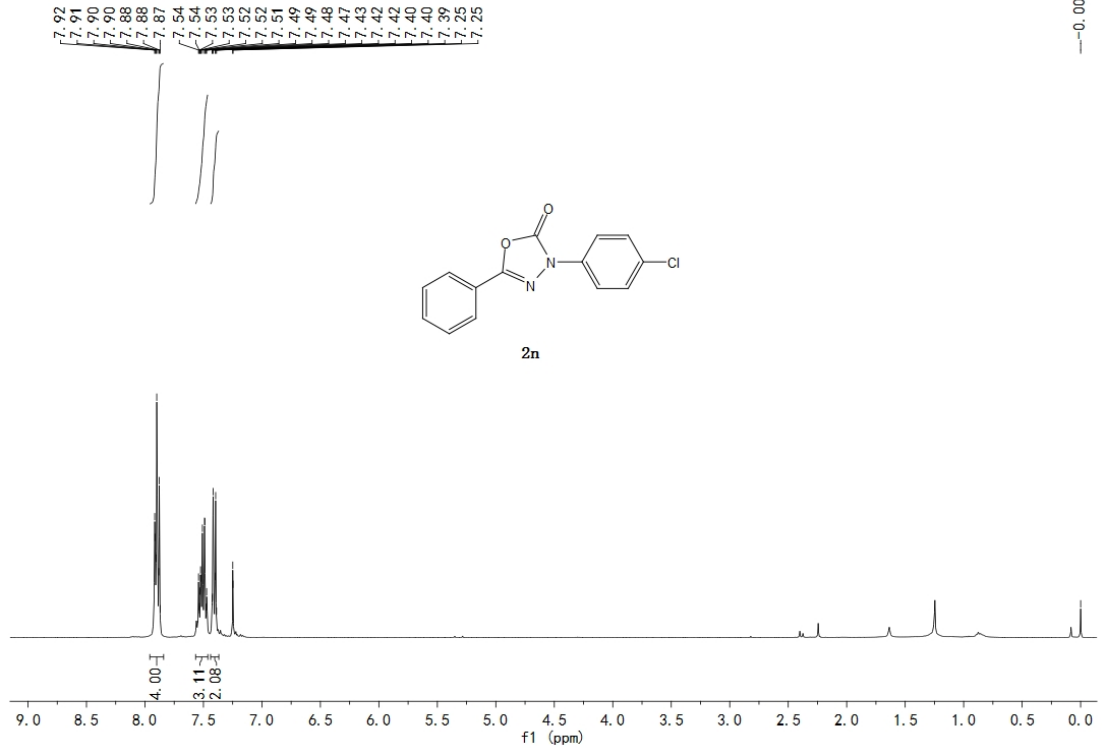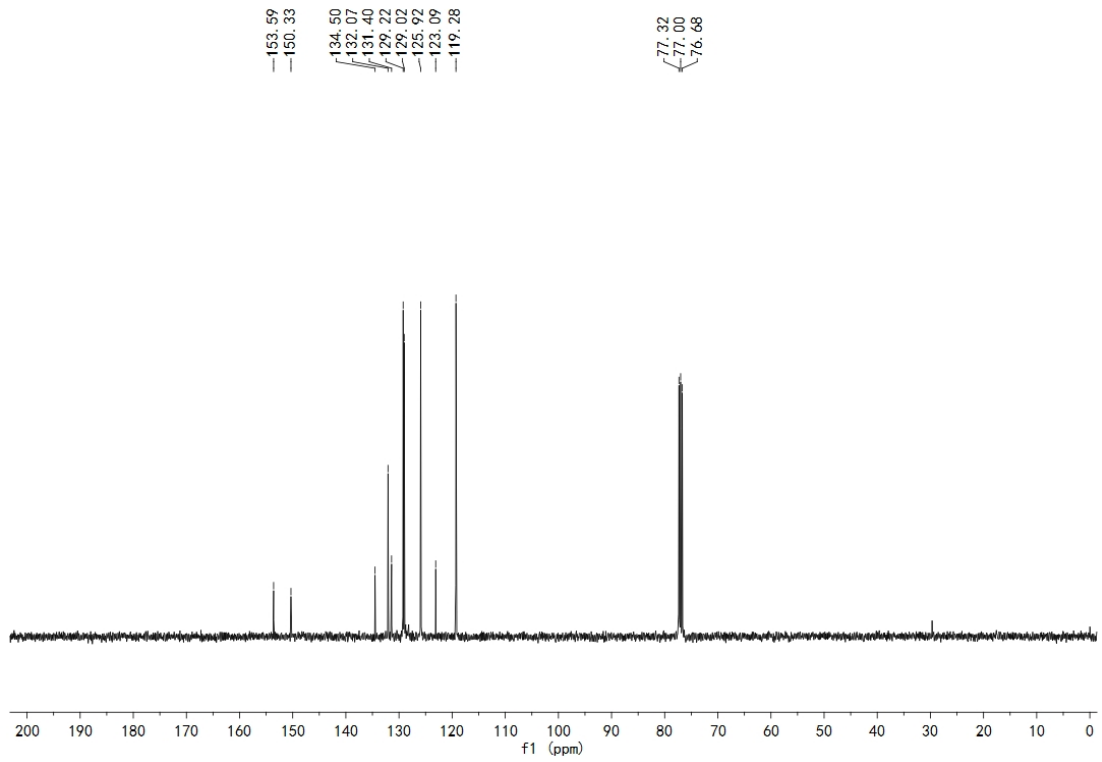

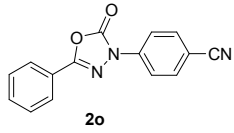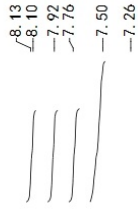

0.08  
0.00

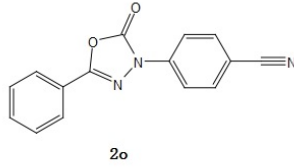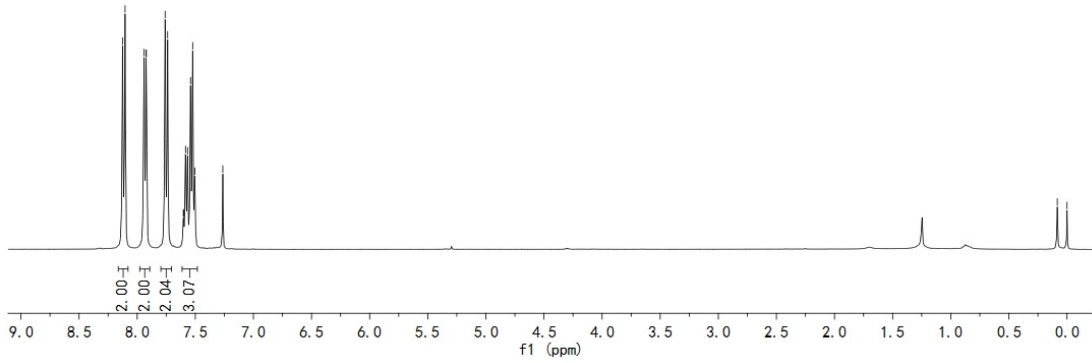

174.24  
154.14  
149.98  
139.26  
132.47  
126.07  
122.66  
118.26  
117.97  
109.20  
77.32  
77.00  
76.68

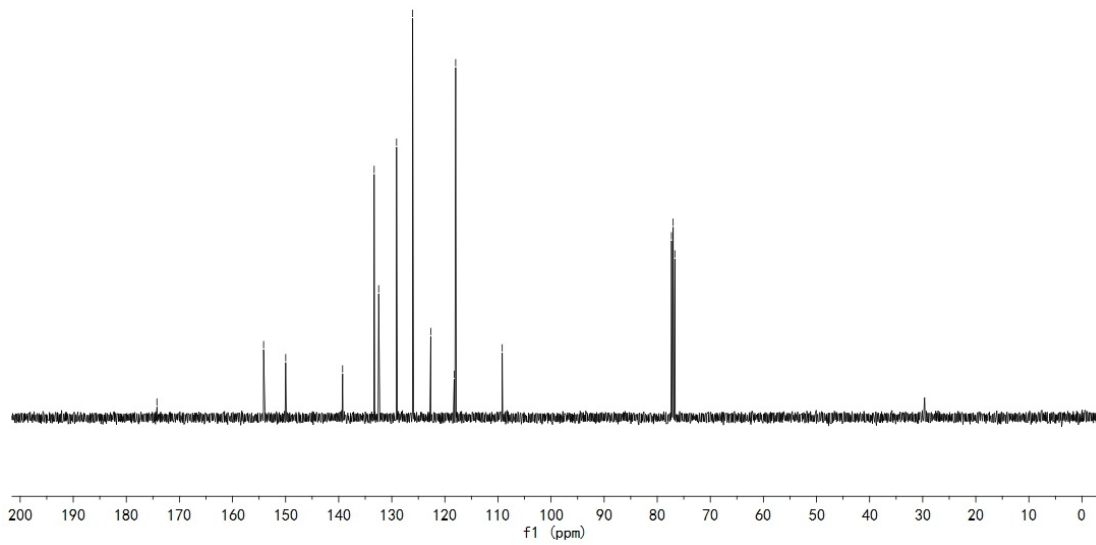

Supplement: c4cc08731c1.pdf [file c4cc08731c1.pdf]
